# Supplementary material
Source: publisher figshare collection journal article supplement (https://gsajournals.figshare.com/ndownloader/files/15041069)

Supplementary Fig. S5. PCR-based validation of putative W-linked ddRAD markers in ten-individual test panel of known-sex *Cryptobranchus* and *Andrias*.

(A) Candidate locus 9 (STACKS ID 1024220).

Ladder C35AM C36AM C94DM C58BM AD01M C37AF C38AF C91CF C56BF AD03F NCont.

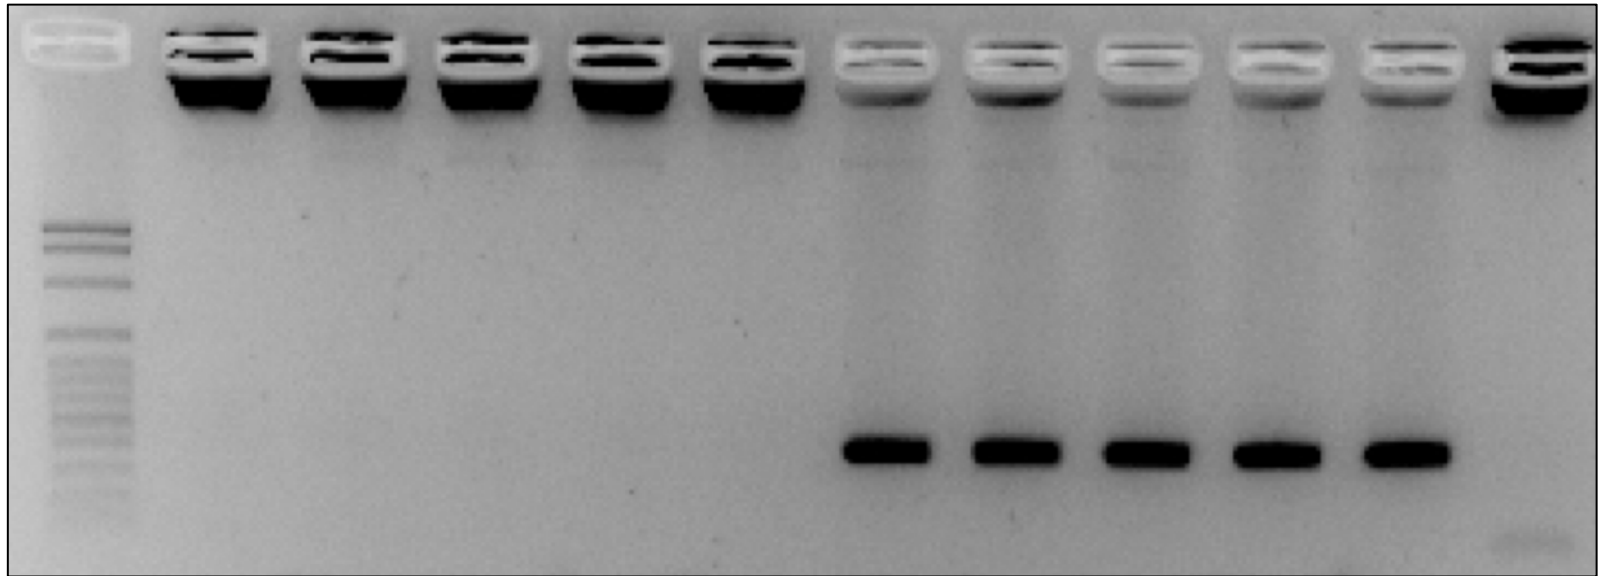

Supplementary Fig. S5. PCR-based validation of putative W-linked ddRAD markers in ten-individual test panel of known-sex *Cryptobranchus* and *Andrias*.

(B) Candidate locus 10 (STACKS ID 1026674).

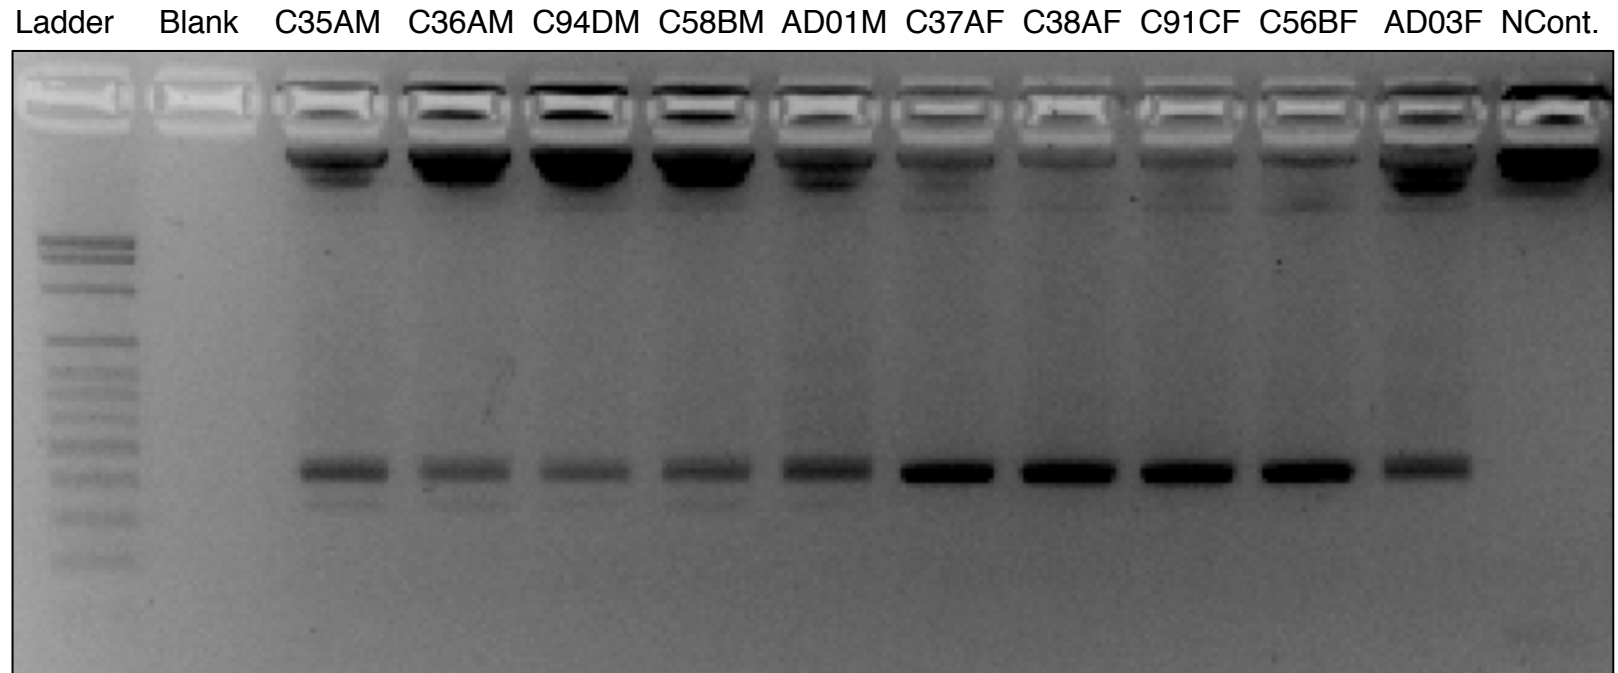

Supplementary Fig. S5. PCR-based validation of putative W-linked ddRAD markers in ten-individual test panel of known-sex *Cryptobranchus* and *Andrias*.

(C) Candidate locus 12 (STACKS ID 1029082).

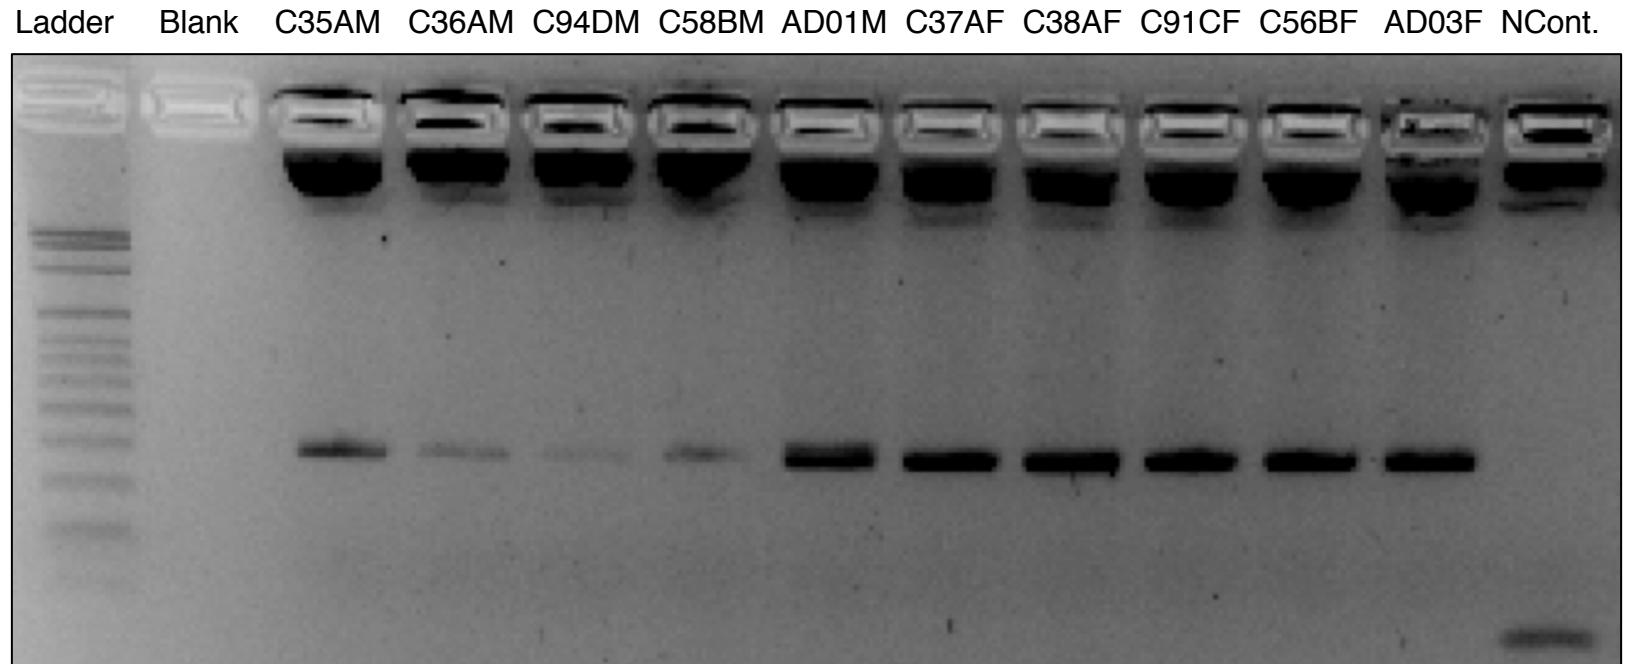

Supplementary Fig. S5. PCR-based validation of putative W-linked ddRAD markers in ten-individual test panel of known-sex *Cryptobranchus* and *Andrias*.

(D) Candidate locus 14 (STACKS ID 1031163).

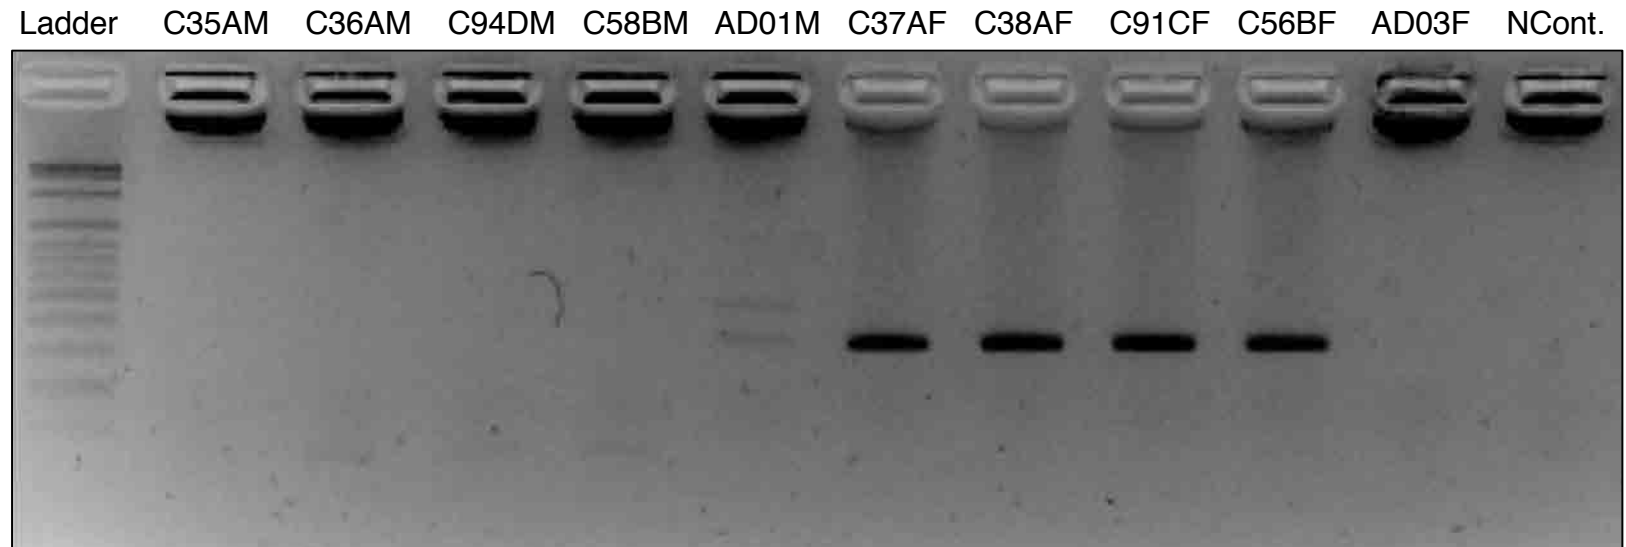

Supplementary Fig. S5. PCR-based validation of putative W-linked ddRAD markers in ten-individual test panel of known-sex *Cryptobranchus* and *Andrias*.

(E) Candidate locus 16 (STACKS ID 1036594).

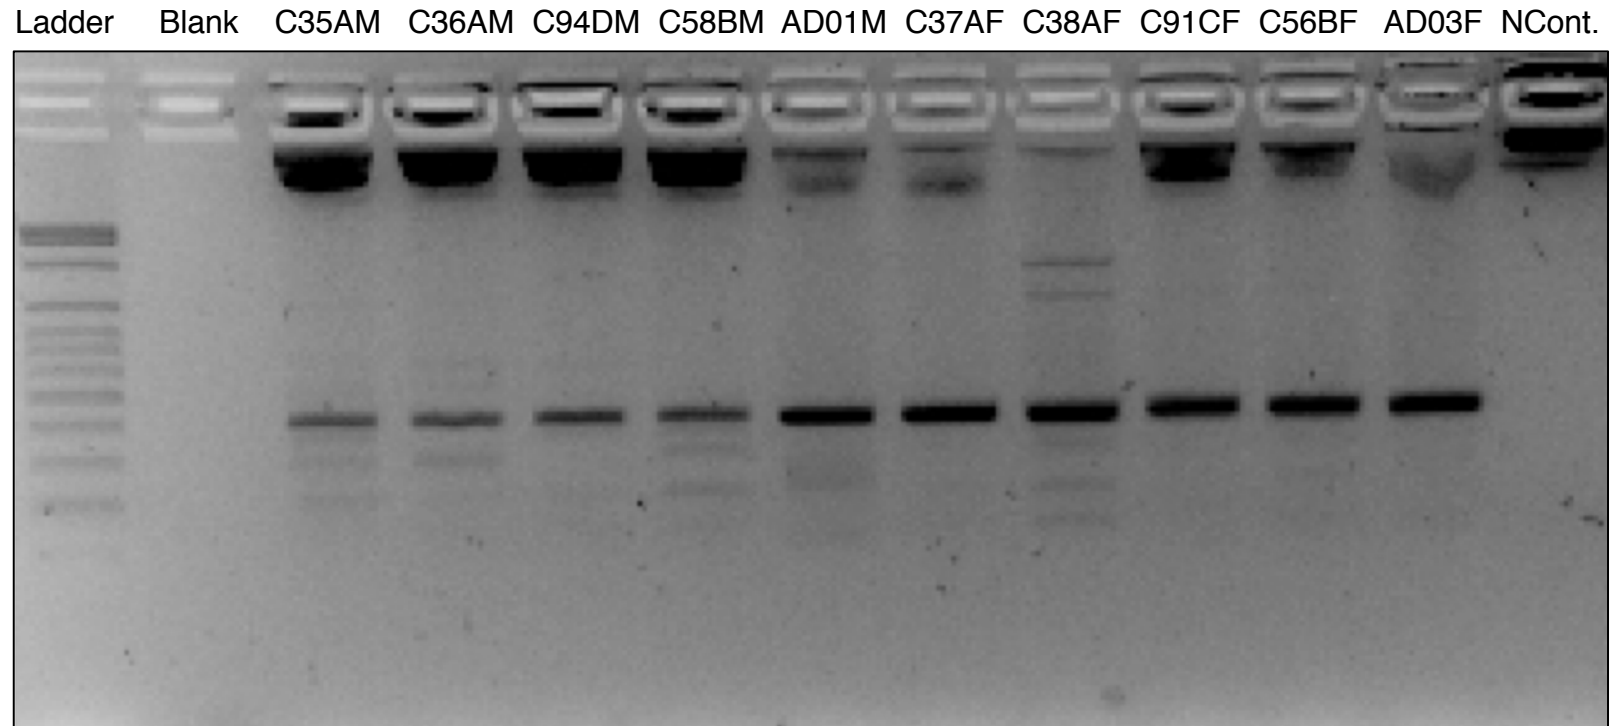

Supplementary Fig. S5. PCR-based validation of putative W-linked ddRAD markers in ten-individual test panel of known-sex *Cryptobranchus* and *Andrias*.

(F) Candidate locus 19 (STACKS ID 1053606).

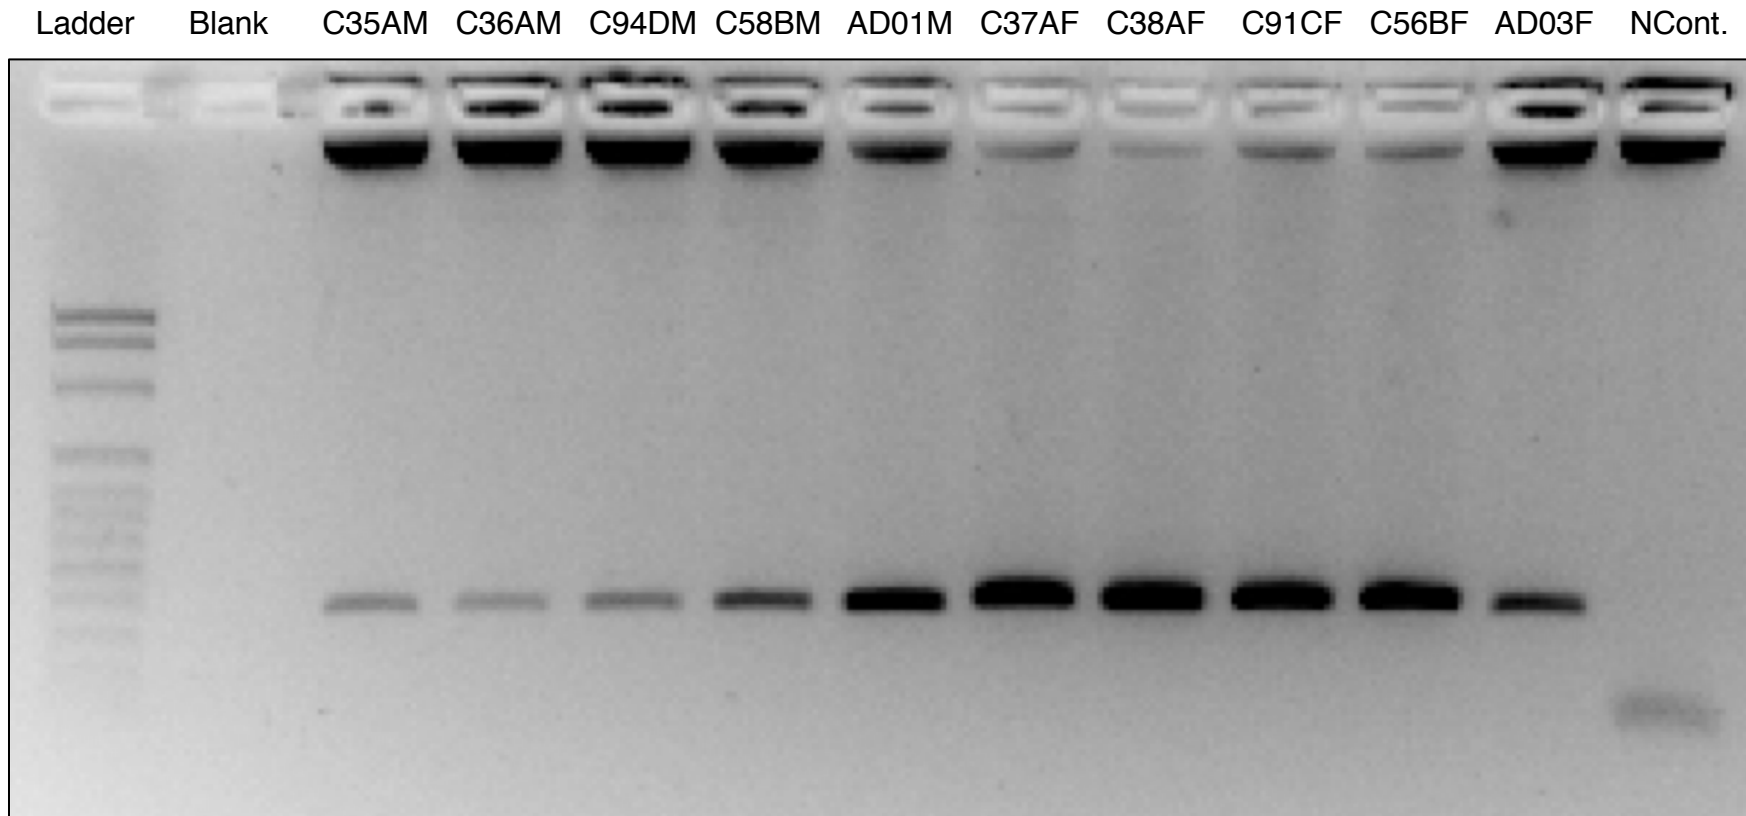

Supplementary Fig. S5. PCR-based validation of putative W-linked ddRAD markers in ten-individual test panel of known-sex *Cryptobranchus* and *Andrias*.

(G) Candidate locus 23 (STACKS ID 1059944).

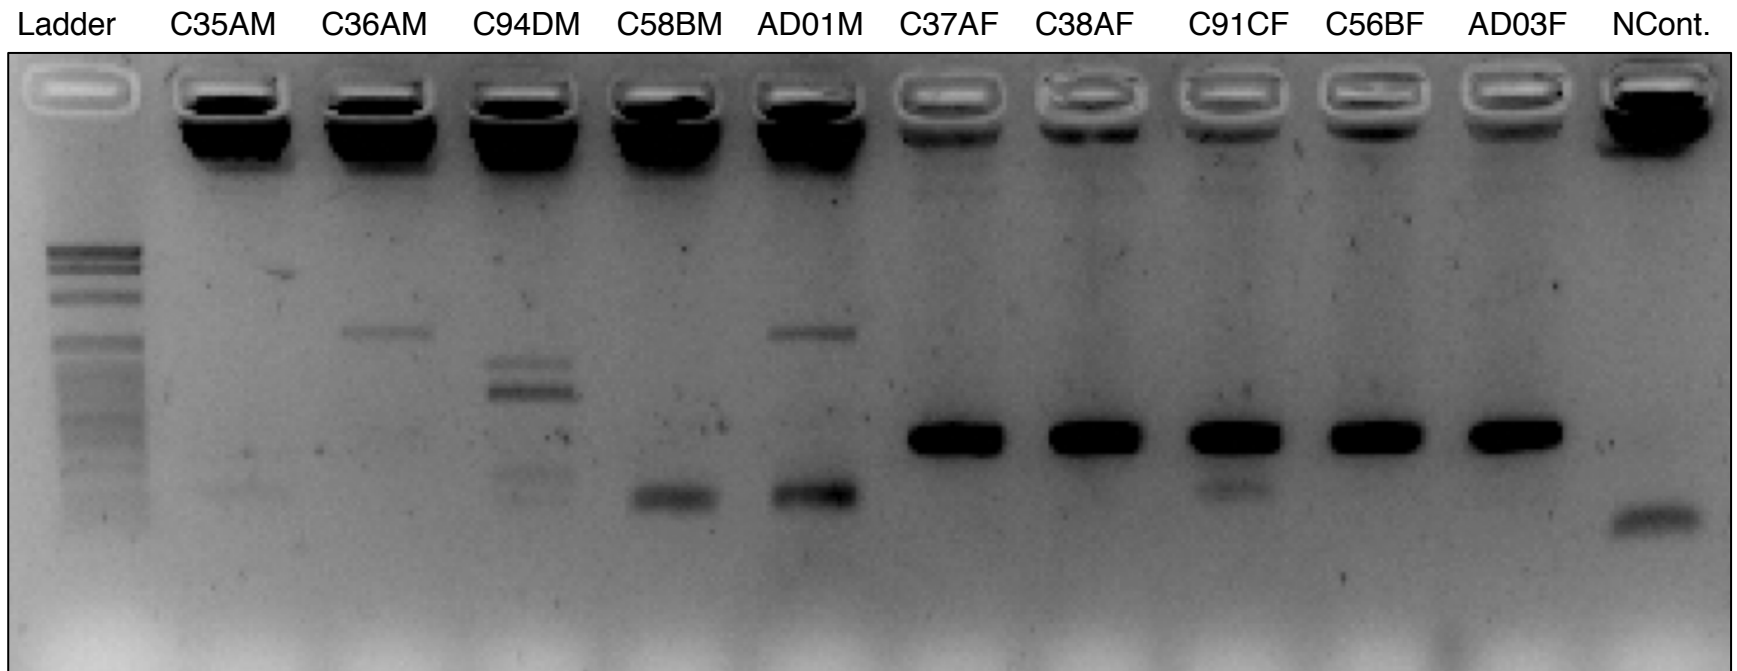

Supplementary Fig. S5. PCR-based validation of putative W-linked ddRAD markers in ten-individual test panel of known-sex *Cryptobranchus* and *Andrias*.

(H) Candidate locus 32 (STACKS ID 1098439).

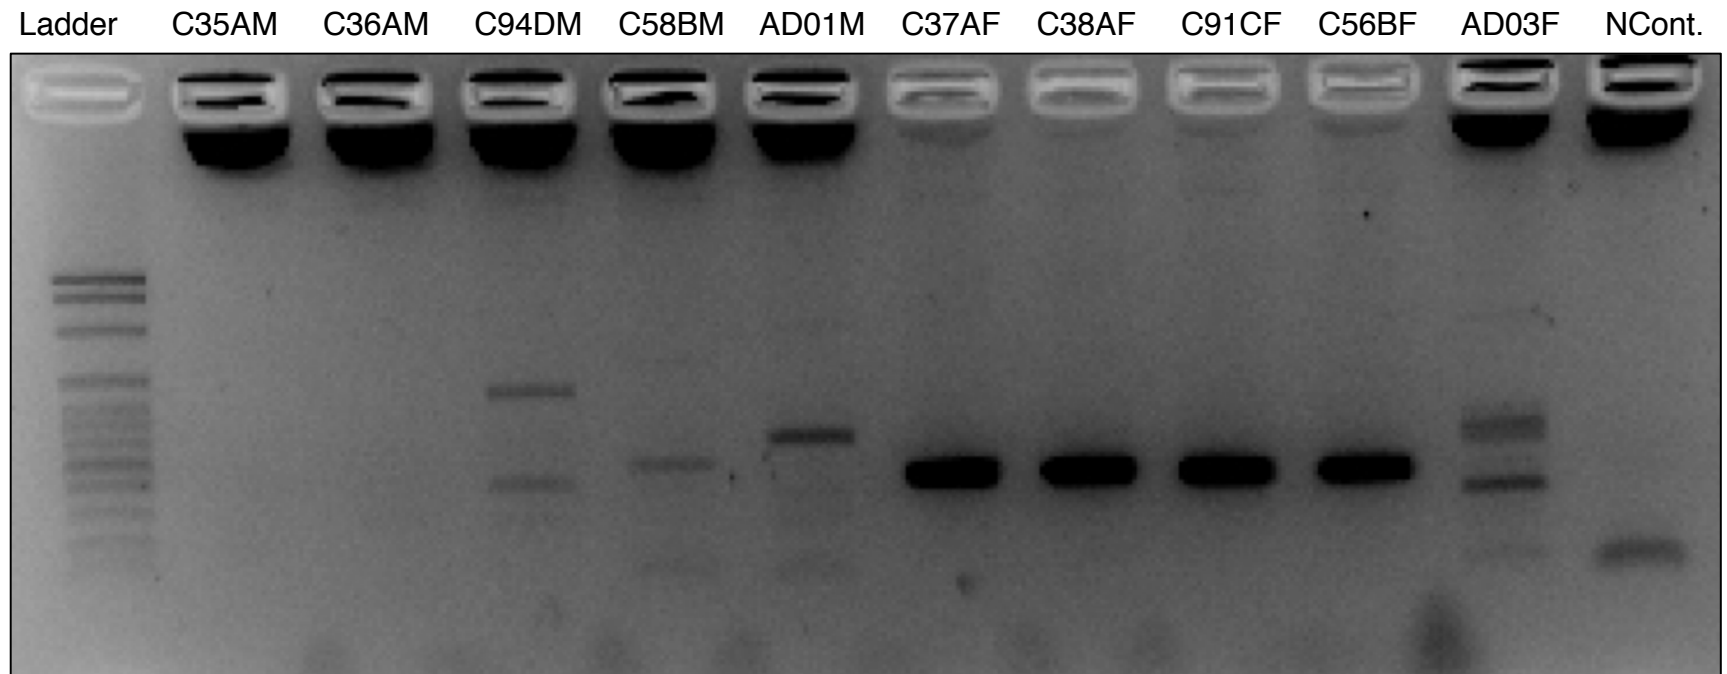



Supplementary Fig. S5. PCR-based validation of putative W-linked ddRAD markers in ten-individual test panel of known-sex *Cryptobranchus* and *Andrias*.

(I) Candidate locus 34 (STACKS ID 1102805).

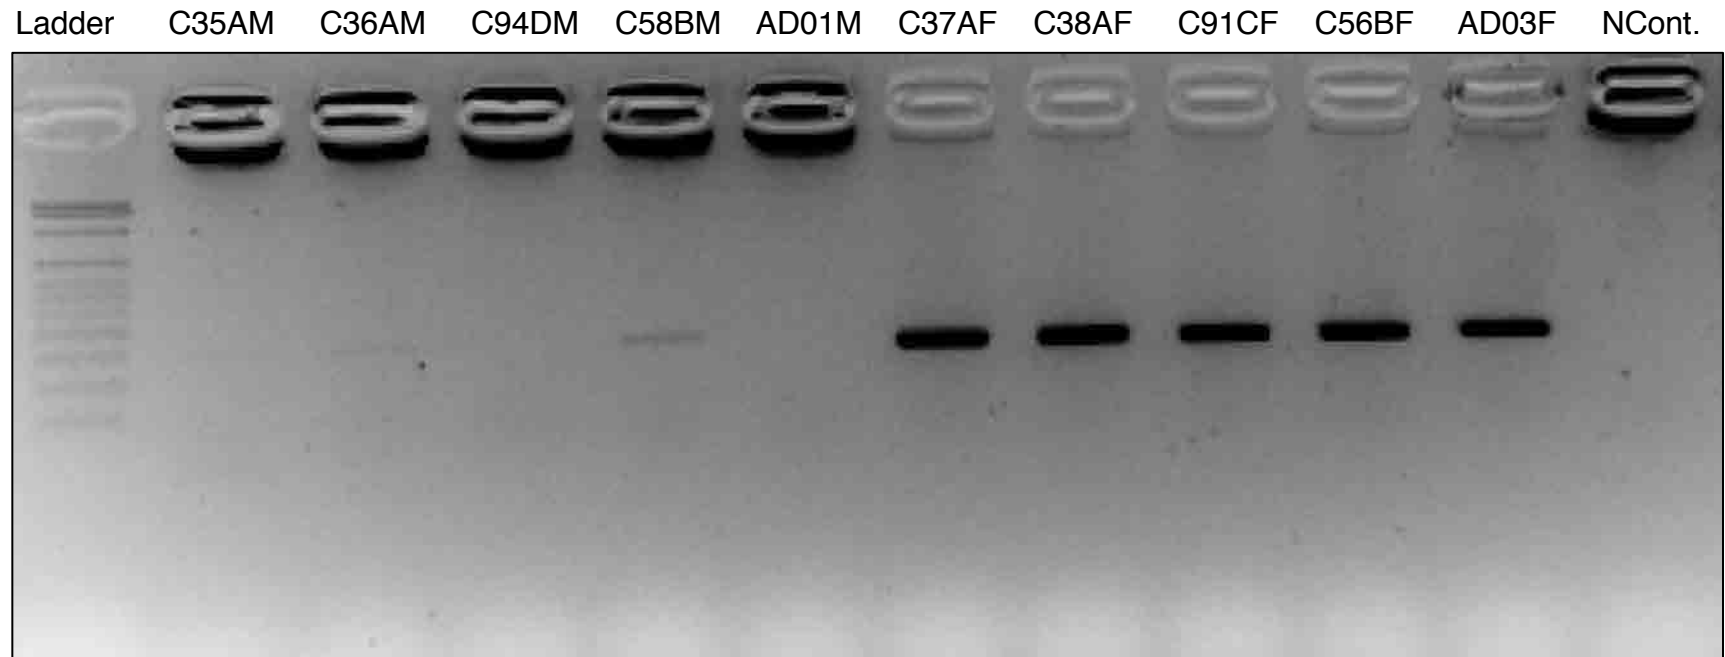

Supplementary Fig. S5. PCR-based validation of putative W-linked ddRAD markers in ten-individual test panel of known-sex *Cryptobranchus* and *Andrias*.

(J) Candidate locus 38 (STACKS ID 1110384).

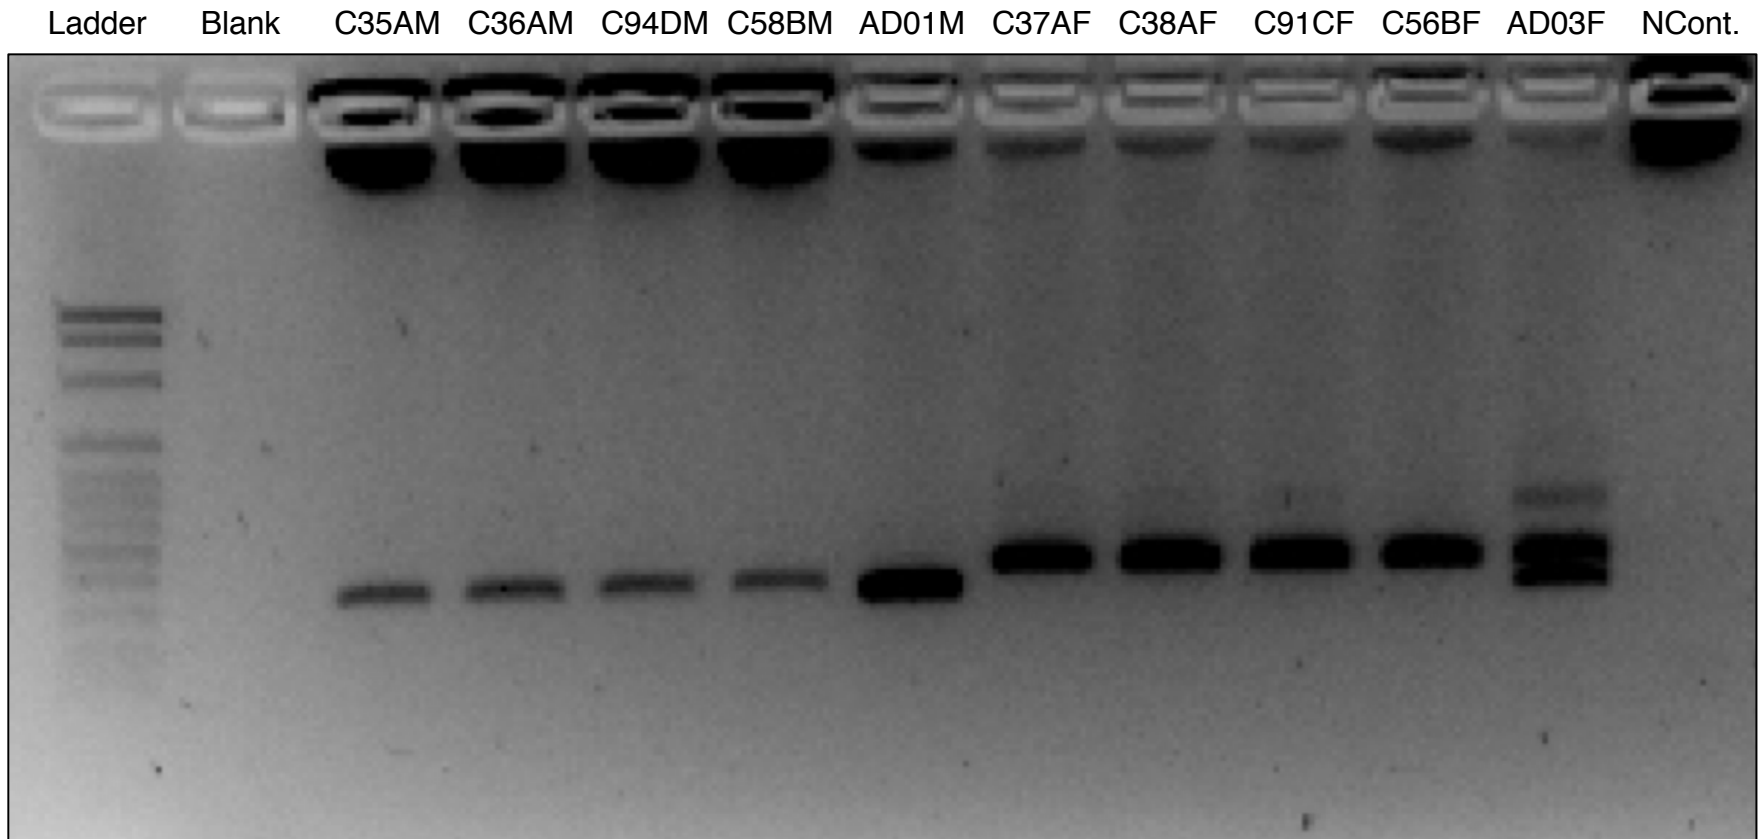

Supplementary Fig. S5. PCR-based validation of putative W-linked ddRAD markers in ten-individual test panel of known-sex *Cryptobranchus* and *Andrias*.

(K) Candidate locus 39 (STACKS ID 1120030).

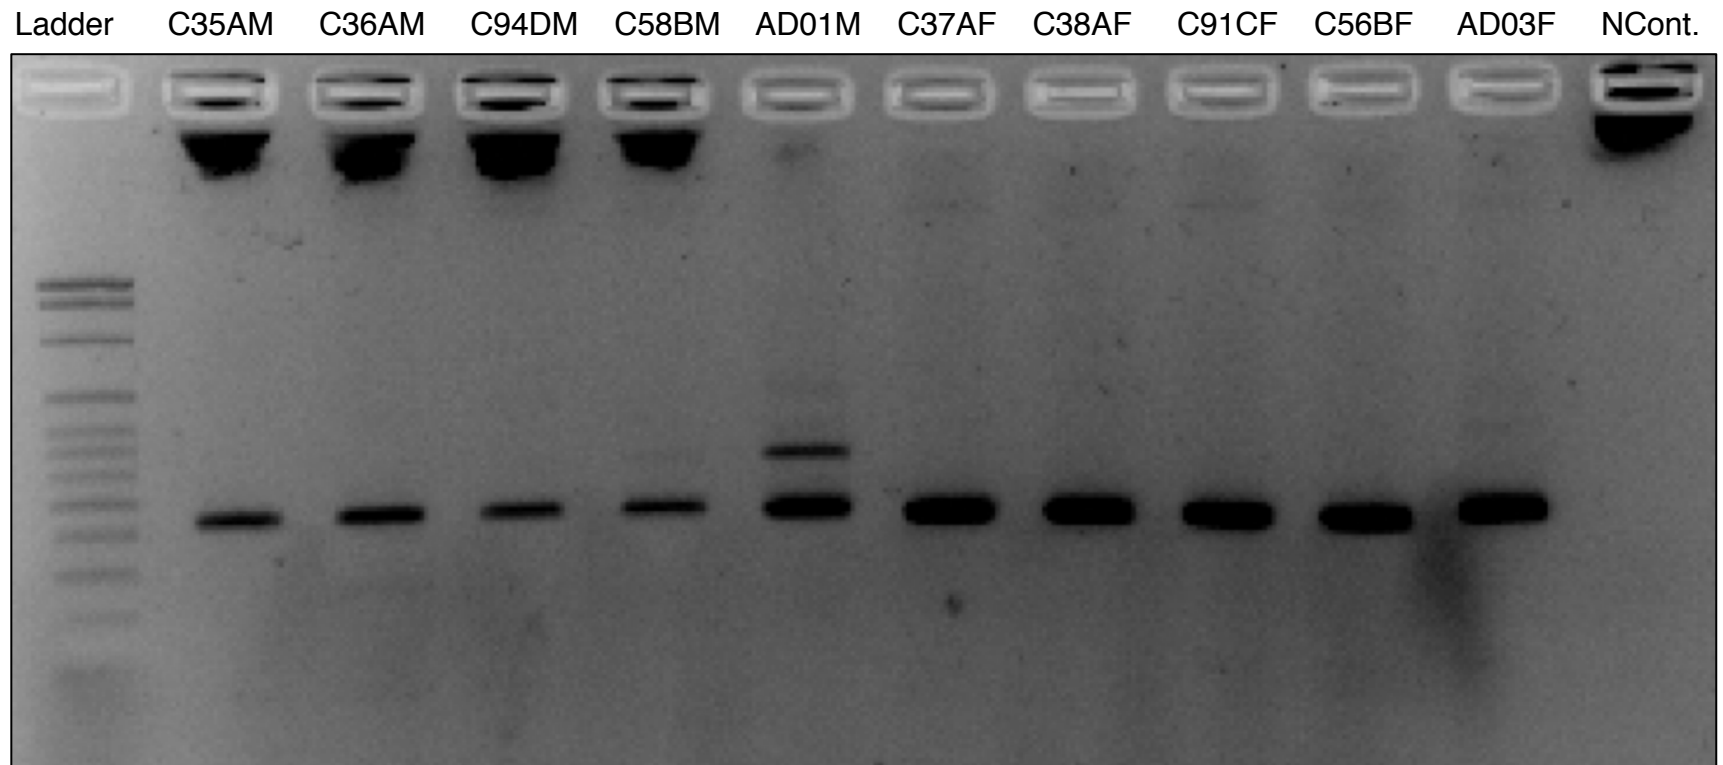

Supplementary Fig. S5. PCR-based validation of putative W-linked ddRAD markers in ten-individual test panel of known-sex *Cryptobranchus* and *Andrias*.

(L) Candidate locus 43 (STACKS ID 1130179).

Ladder    Blank    C35AM   C36AM   C94DM   C58BM   AD01M   C37AF   C38AF   C91CF   C56BF   AD03F   NCont.

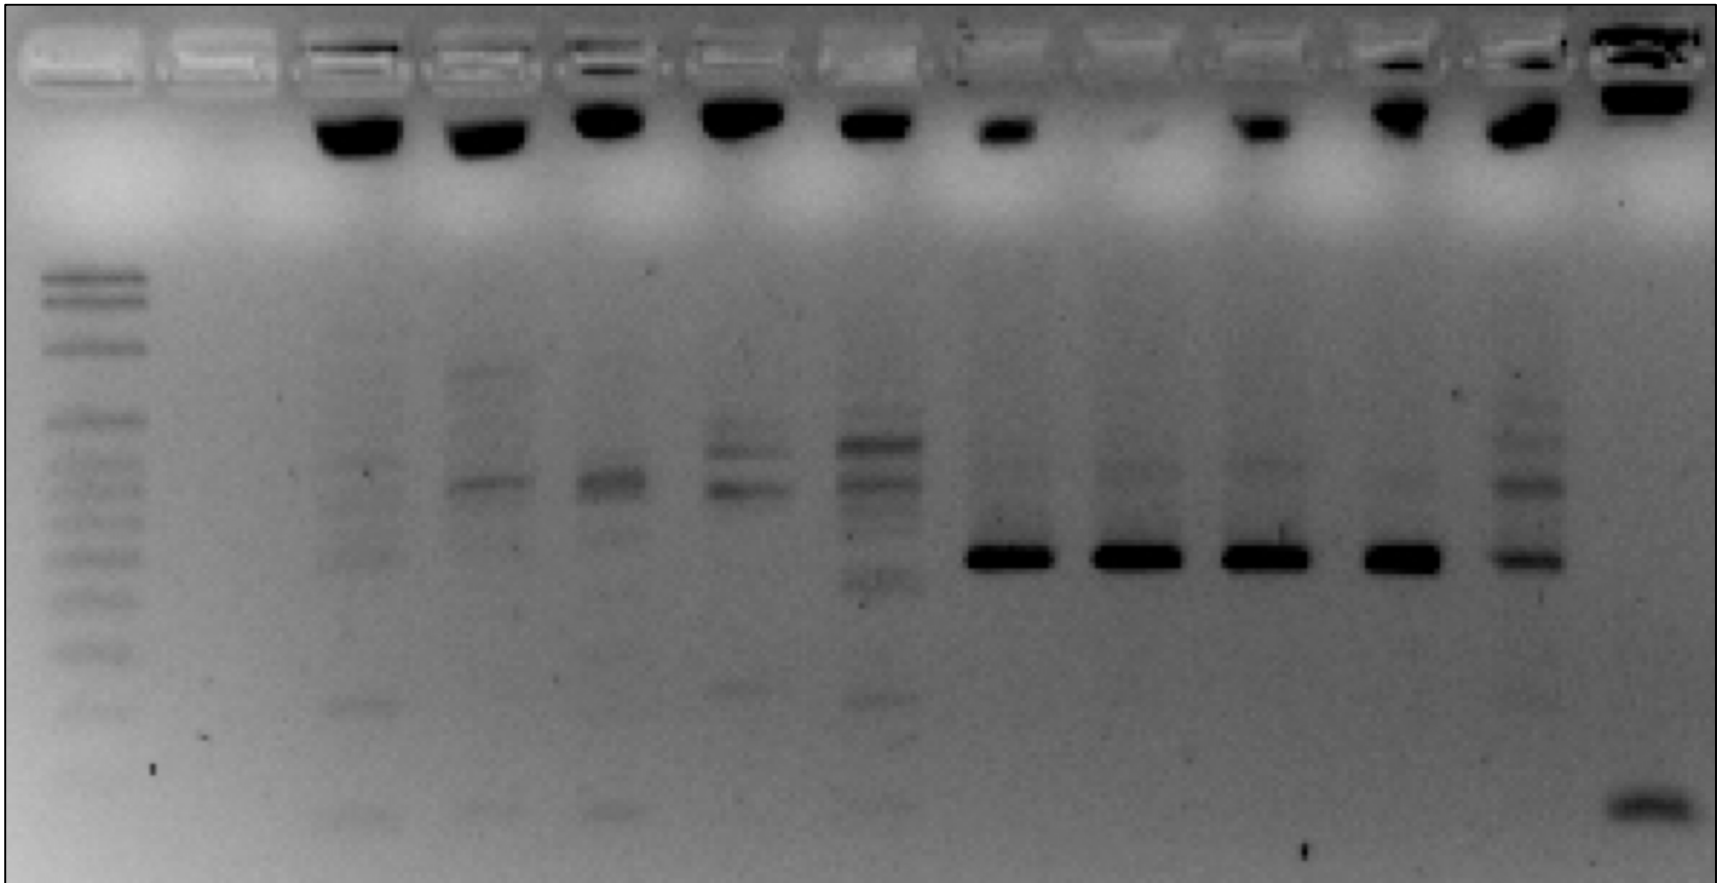

Supplementary Fig. S5. PCR-based validation of putative W-linked ddRAD markers in ten-individual test panel of known-sex *Cryptobranchus* and *Andrias*.

(M) 18S rRNA positive control.

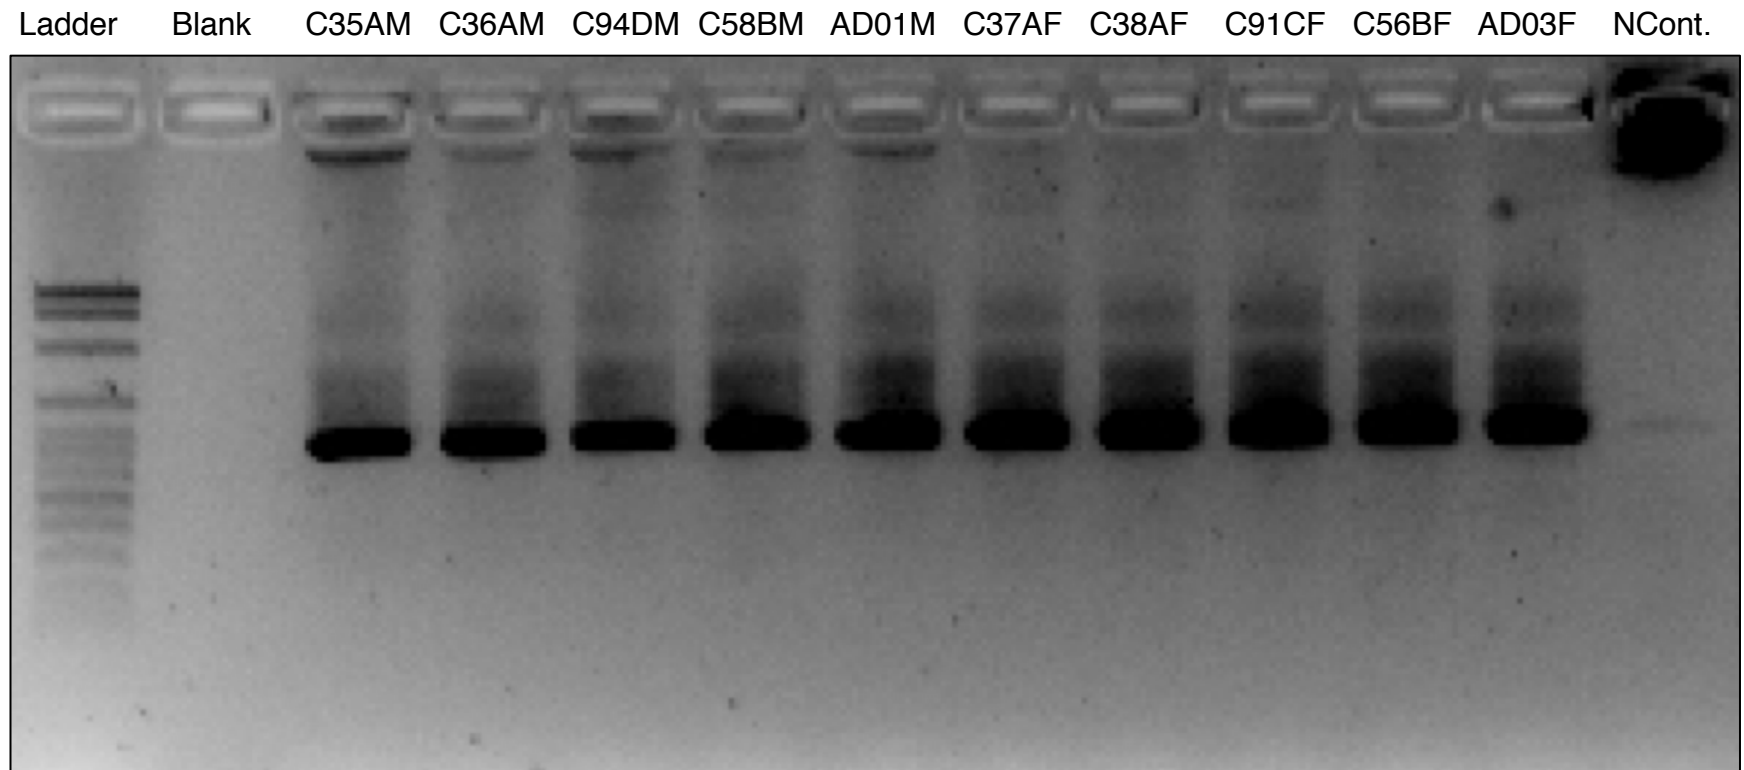

Supplement: Supplementary file 1 [file 15041069]
